# Supplementary material for: What do primary care staff know and do about blood borne virus testing and care for migrant patients? A national survey
Source: Springer Nature journal article supplement (doi:10.1186/s12889-020-10068-x), 2021-02-11
Supplement: MOESM1 [file 18856194]

## Additional file 1: Full online questionnaire

### GP knowledge, attitudes, policy and practice regarding blood borne viruses (BBV) among migrants, including refugees and asylum seekers

Welcome

Public Health England is carrying out a survey of GPs' knowledge, attitudes, policy and practice on BBV testing and care among migrants including refugees and asylum seekers.

This is part of a larger programme of work to identify good practice and gaps in blood-borne virus service provision for these populations.

We would be grateful if you would complete this short survey.

#### 1. Please tell us who you are?

- GP Partner
- Salaried GP
- Locum GP
- Practice Nurse
- Practice Manager
- Other, please specify

### Section 1. Knowledge of migrant health, policy and recommendations

#### 2. To the best of your knowledge, as of August 2017 which of the following services are free to all irrespective of migration status?

- |                                                                                                                      |     |                          |    |                          |    |                          |
|----------------------------------------------------------------------------------------------------------------------|-----|--------------------------|----|--------------------------|----|--------------------------|
| GP and nurse consultations in primary care                                                                           | Yes | <input type="checkbox"/> | No | <input type="checkbox"/> | NK | <input type="checkbox"/> |
| Emergency departments and walk in centres                                                                            | Yes | <input type="checkbox"/> | No | <input type="checkbox"/> | NK | <input type="checkbox"/> |
| Communicable disease services                                                                                        | Yes | <input type="checkbox"/> | No | <input type="checkbox"/> | NK | <input type="checkbox"/> |
| Sexually transmitted disease services                                                                                | Yes | <input type="checkbox"/> | No | <input type="checkbox"/> | NK | <input type="checkbox"/> |
| Family Planning Services                                                                                             | Yes | <input type="checkbox"/> | No | <input type="checkbox"/> | NK | <input type="checkbox"/> |
| Treatment of physical or mental conditions caused by torture, female genital mutilation, domestic or sexual violence | Yes | <input type="checkbox"/> | No | <input type="checkbox"/> | NK | <input type="checkbox"/> |
| Operations or outpatient services in secondary care                                                                  | Yes | <input type="checkbox"/> | No | <input type="checkbox"/> | NK | <input type="checkbox"/> |
| Hepatitis B and C testing, diagnosis and management                                                                  | Yes | <input type="checkbox"/> | No | <input type="checkbox"/> | NK | <input type="checkbox"/> |

#### 3. Public Health England has published a Migrant Health Guide online on GOV.UK.

- Have you heard of the migrant health guide? Yes  No
- If yes, have you used the guide? Yes  No  NA

**If you have not used the Migrant Health Guide, skip to Section 2**

**If you have used the Migrant Health Guide, did you use it and find it helpful when looking for information on?**

|                                       | Used it and found it helpful        | Used it but did not find it helpful for this | Did not use it           |
|---------------------------------------|-------------------------------------|----------------------------------------------|--------------------------|
| Communicable diseases                 | <input type="checkbox"/>            | <input type="checkbox"/>                     | <input type="checkbox"/> |
| Non-communicable health concerns      | <input type="checkbox"/>            | <input type="checkbox"/>                     | <input type="checkbox"/> |
| NHS entitlements                      | <input type="checkbox"/>            | <input type="checkbox"/>                     | <input type="checkbox"/> |
| Country specific advice               | <input type="checkbox"/>            | <input type="checkbox"/>                     | <input type="checkbox"/> |
| Assessing new patients from overseas  | <input type="checkbox"/>            | <input type="checkbox"/>                     | <input type="checkbox"/> |
| Culture, spirituality and religion    | <input type="checkbox"/>            | <input type="checkbox"/>                     | <input type="checkbox"/> |
| Language interpretation               | <input type="checkbox"/>            | <input type="checkbox"/>                     | <input type="checkbox"/> |
| Travel to visit friends and relatives | <input checked="" type="checkbox"/> | <input type="checkbox"/>                     | <input type="checkbox"/> |
| Human trafficking                     | <input type="checkbox"/>            | <input type="checkbox"/>                     | <input type="checkbox"/> |

## Section 2. Perception of migrant health care needs

**6. What do you think are the biggest challenges/ barriers that migrant populations face in accessing health care? Please give the top three, in your opinion.**

|          | Asylum seekers | All migrants |
|----------|----------------|--------------|
| <b>1</b> |                |              |
| <b>2</b> |                |              |
| <b>3</b> |                |              |

**7. How often do you see migrant patients?**

Daily  Regularly (at least once a week)  Rarely (less than once a week)

**8. Which of the following issues do you consider when speaking to new migrant patients?**

|                                   | All new migrants         | Asylum seekers / refugees only | Never consider this      | Situation specific       |
|-----------------------------------|--------------------------|--------------------------------|--------------------------|--------------------------|
| How long have they been in the UK | <input type="checkbox"/> | <input type="checkbox"/>       | <input type="checkbox"/> | <input type="checkbox"/> |
| How much social support           | <input type="checkbox"/> | <input type="checkbox"/>       | <input type="checkbox"/> | <input type="checkbox"/> |

they have

|                                          |                          |                          |                          |                          |
|------------------------------------------|--------------------------|--------------------------|--------------------------|--------------------------|
| Integration into UK society              | <input type="checkbox"/> | <input type="checkbox"/> | <input type="checkbox"/> | <input type="checkbox"/> |
| Housing                                  | <input type="checkbox"/> | <input type="checkbox"/> | <input type="checkbox"/> | <input type="checkbox"/> |
| Family situation                         | <input type="checkbox"/> | <input type="checkbox"/> | <input type="checkbox"/> | <input type="checkbox"/> |
| Migration history                        | <input type="checkbox"/> | <input type="checkbox"/> | <input type="checkbox"/> | <input type="checkbox"/> |
| Experiences of torture/violence          | <input type="checkbox"/> | <input type="checkbox"/> | <input type="checkbox"/> | <input type="checkbox"/> |
| Disability/special needs                 | <input type="checkbox"/> | <input type="checkbox"/> | <input type="checkbox"/> | <input type="checkbox"/> |
| Diet/Nutrition                           | <input type="checkbox"/> | <input type="checkbox"/> | <input type="checkbox"/> | <input type="checkbox"/> |
| Vaccination history                      | <input type="checkbox"/> | <input type="checkbox"/> | <input type="checkbox"/> | <input type="checkbox"/> |
| Sexual health advice and screening       | <input type="checkbox"/> | <input type="checkbox"/> | <input type="checkbox"/> | <input type="checkbox"/> |
| Family planning                          | <input type="checkbox"/> | <input type="checkbox"/> | <input type="checkbox"/> | <input type="checkbox"/> |
| TB screening                             | <input type="checkbox"/> | <input type="checkbox"/> | <input type="checkbox"/> | <input type="checkbox"/> |
| HIV risk assessment                      | <input type="checkbox"/> | <input type="checkbox"/> | <input type="checkbox"/> | <input type="checkbox"/> |
| Hep B risk assessment                    | <input type="checkbox"/> | <input type="checkbox"/> | <input type="checkbox"/> | <input type="checkbox"/> |
| Hep C risk assessment                    | <input type="checkbox"/> | <input type="checkbox"/> | <input type="checkbox"/> | <input type="checkbox"/> |
| Sickle cell/thalassaemia risk assessment | <input type="checkbox"/> | <input type="checkbox"/> | <input type="checkbox"/> | <input type="checkbox"/> |
| Psychological well-being                 | <input type="checkbox"/> | <input type="checkbox"/> | <input type="checkbox"/> | <input type="checkbox"/> |
| Dental health                            | <input type="checkbox"/> | <input type="checkbox"/> | <input type="checkbox"/> | <input type="checkbox"/> |
| Vision and hearing                       | <input type="checkbox"/> | <input type="checkbox"/> | <input type="checkbox"/> | <input type="checkbox"/> |

### Section 3. Patient information received for refugees and asylum seekers

9. Do you receive patients from the following refugee resettlement programmes?

|                                               |                              |                             |                             |
|-----------------------------------------------|------------------------------|-----------------------------|-----------------------------|
| Gateway Resettlement Programme                | Yes <input type="checkbox"/> | No <input type="checkbox"/> | NK <input type="checkbox"/> |
| Syrian Vulnerable Persons Resettlement Scheme | Yes <input type="checkbox"/> | No <input type="checkbox"/> | NK <input type="checkbox"/> |
| Vulnerable Children's Resettlement Scheme     | Yes <input type="checkbox"/> | No <input type="checkbox"/> | NK <input type="checkbox"/> |

10. Do you receive patients who are new asylum seekers? Yes  No  NK

11. If you receive patients who are part of refugee resettlement programmes, do you receive information from their pre-entry health assessment?

Often/Always  Sometimes  Rarely  Never  Don't know  NA

12. If you receive new asylum seekers, do you receive any clinical reports about health screening they have received in initial accommodation?

Often/Always  Sometimes  Rarely  Never  Don't know  NA

13. If yes, do you receive BBV testing results on patients who are asylum seekers?

Often/Always  Sometimes  Rarely  Never  Don't know  NA

## Section 4. Current Practice Policy for BBV testing

The following questions are about GP practice policy for BBV testing.

If you work in more than one practice, please think about the practice that you are most familiar with and respond for that practice.

**14. What is the current policy in your practice for BBV testing for NEW migrants? Please read the options carefully and tick the boxes which best describe your GP practice current policy, or leave blank if none apply.**

|                                                                                                 | HIV                      | HBV                      | HCV                      |
|-------------------------------------------------------------------------------------------------|--------------------------|--------------------------|--------------------------|
| Offered universally / 'opt out' basis to all new migrants                                       | <input type="checkbox"/> | <input type="checkbox"/> | <input type="checkbox"/> |
| Offered to all new migrants on ad hoc basis, depending on individual risk factors               | <input type="checkbox"/> | <input type="checkbox"/> | <input type="checkbox"/> |
| Offered universally / 'opt out' basis to asylum seekers / refugees only                         | <input type="checkbox"/> | <input type="checkbox"/> | <input type="checkbox"/> |
| Offered to asylum seekers / refugees only on ad hoc basis, depending on individual risk factors | <input type="checkbox"/> | <input type="checkbox"/> | <input type="checkbox"/> |
| Don't know                                                                                      | <input type="checkbox"/> | <input type="checkbox"/> | <input type="checkbox"/> |

**15. What is the current policy in your practice for BBV testing offered to EXISTING patients who are migrants from higher prevalence countries?**

|                                                                                   | HIV                      | HBV                      | HCV                      |
|-----------------------------------------------------------------------------------|--------------------------|--------------------------|--------------------------|
| Offered universally / 'opt out' basis to all new migrants                         | <input type="checkbox"/> | <input type="checkbox"/> | <input type="checkbox"/> |
| Offered to all new migrants on ad hoc basis, depending on individual risk factors | <input type="checkbox"/> | <input type="checkbox"/> | <input type="checkbox"/> |
| Offered universally / 'opt out' basis to asylum seekers / refugees only           | <input type="checkbox"/> | <input type="checkbox"/> | <input type="checkbox"/> |

|                                                                                                 |                          |                          |                          |
|-------------------------------------------------------------------------------------------------|--------------------------|--------------------------|--------------------------|
|                                                                                                 | <input type="checkbox"/> | <input type="checkbox"/> | <input type="checkbox"/> |
| Offered to asylum seekers / refugees only on ad hoc basis, depending on individual risk factors |                          |                          |                          |
| Don't know                                                                                      | <input type="checkbox"/> | <input type="checkbox"/> | <input type="checkbox"/> |

**16. How are existing patients who are migrants identified for BBV testing at your practice?**

|                                                      |                              |                             |                             |                          |
|------------------------------------------------------|------------------------------|-----------------------------|-----------------------------|--------------------------|
| Periodic flagging of GP system by automated software | Yes <input type="checkbox"/> | No <input type="checkbox"/> | NK <input type="checkbox"/> | <input type="checkbox"/> |
| Periodic flagging of GP system by manual audit       | Yes <input type="checkbox"/> | No <input type="checkbox"/> | NK <input type="checkbox"/> | <input type="checkbox"/> |
| Opportunistic during consultation                    | Yes <input type="checkbox"/> | No <input type="checkbox"/> | NK <input type="checkbox"/> | <input type="checkbox"/> |
| Don't know                                           | Yes <input type="checkbox"/> | No <input type="checkbox"/> | NK <input type="checkbox"/> | <input type="checkbox"/> |

**17. What do you think are the barriers for BBV testing of migrant patients attending your practice?**

**18. What tests are requested when you test for hepatitis B?**

HBsAg     HBcAb     Not known     Other (specify)

**19. What tests are requested when you test for hepatitis C?**

Anti-HCV     HCV RNA     Not known     Other (specify)

**20. What tests are requested when you test for HIV?**

Anti-HIV     Not known     Other (specify)

**21. Do you use dried blood spot testing (DBS)?**

Yes     No     NK

**22. Who is most likely to perform BBV testing at your practice?**

GP     Phlebotomist     Practice nurse     Don't know

Other (specify)

**23. Which of the following would be an incentive or motivation to test for BBVs in migrants?**

|                               |                              |                             |                             |                          |
|-------------------------------|------------------------------|-----------------------------|-----------------------------|--------------------------|
| Performance payment structure | Yes <input type="checkbox"/> | No <input type="checkbox"/> | NK <input type="checkbox"/> | <input type="checkbox"/> |
| Local targets                 | Yes <input type="checkbox"/> | No <input type="checkbox"/> | NK <input type="checkbox"/> | <input type="checkbox"/> |

|                      |     |                          |    |                          |    |                          |
|----------------------|-----|--------------------------|----|--------------------------|----|--------------------------|
| National goals       | Yes | <input type="checkbox"/> | No | <input type="checkbox"/> | NK | <input type="checkbox"/> |
| CCG recommendations  | Yes | <input type="checkbox"/> | No | <input type="checkbox"/> | NK | <input type="checkbox"/> |
| PHE recommendation   | Yes | <input type="checkbox"/> | No | <input type="checkbox"/> | NK | <input type="checkbox"/> |
| NICE guidance        | Yes | <input type="checkbox"/> | No | <input type="checkbox"/> | NK | <input type="checkbox"/> |
| NHSE recommendations | Yes | <input type="checkbox"/> | No | <input type="checkbox"/> | NK | <input type="checkbox"/> |
| CMO letter           | Yes | <input type="checkbox"/> | No | <input type="checkbox"/> | NK | <input type="checkbox"/> |
| None of the above    | Yes | <input type="checkbox"/> | No | <input type="checkbox"/> | NK | <input type="checkbox"/> |

**24. The following questions are about people diagnosed with hepatitis B or C.**

|                                                                                                                |     |                          |    |                          |    |                          |
|----------------------------------------------------------------------------------------------------------------|-----|--------------------------|----|--------------------------|----|--------------------------|
| Are all persons positive for hepatitis B referred to secondary care?                                           | Yes | <input type="checkbox"/> | No | <input type="checkbox"/> | NK | <input type="checkbox"/> |
| Are all persons positive for hepatitis C referred to secondary care?                                           | Yes | <input type="checkbox"/> | No | <input type="checkbox"/> | NK | <input type="checkbox"/> |
| If you make referrals to secondary care, do you receive information or check whether the patient has attended? | Yes | <input type="checkbox"/> | No | <input type="checkbox"/> | NK | <input type="checkbox"/> |
| Do you follow up patients that have not attended secondary care appointments?                                  | Yes | <input type="checkbox"/> | No | <input type="checkbox"/> |    |                          |
| Are close contacts of HBV infected cases offered hepatitis B testing?                                          | Yes | <input type="checkbox"/> | No | <input type="checkbox"/> | NK | <input type="checkbox"/> |
| Are close contacts of hepatitis B cases offered hepatitis B vaccination?                                       | Yes | <input type="checkbox"/> | No | <input type="checkbox"/> | NK | <input type="checkbox"/> |

**25. What interventions/services are in place at your practice to facilitate BBV testing and care of migrant patients?**

|                                        |     |                          |    |                          |    |                          |
|----------------------------------------|-----|--------------------------|----|--------------------------|----|--------------------------|
| Specially designated clinic            | Yes | <input type="checkbox"/> | No | <input type="checkbox"/> | NK | <input type="checkbox"/> |
| Designated GP within a practice        | Yes | <input type="checkbox"/> | No | <input type="checkbox"/> | NK | <input type="checkbox"/> |
| Longer appointments at registration    | Yes | <input type="checkbox"/> | No | <input type="checkbox"/> | NK | <input type="checkbox"/> |
| Specific projects to register migrants | Yes | <input type="checkbox"/> | No | <input type="checkbox"/> | NK | <input type="checkbox"/> |
| Outreach facilities                    | Yes | <input type="checkbox"/> | No | <input type="checkbox"/> | NK | <input type="checkbox"/> |
| Health support teams                   | Yes | <input type="checkbox"/> | No | <input type="checkbox"/> | NK | <input type="checkbox"/> |
| Incentive scheme for GPs               | Yes | <input type="checkbox"/> | No | <input type="checkbox"/> | NK | <input type="checkbox"/> |

**26. What do you think are the barriers for your patients with BBV accessing secondary care?**

## Section 5. Your practice information

### 27. Practice details

Practice name:

Practice Postcode:

Location of general practice

### 28. Practice Characteristics:

Number of patients

Number of Staff

### 29. Please select all staff types you have in your practice.

Staff types: GP Partner  Salaried GP  GP Registrar  Practice Nurse  Nurse Practitioner  HCA  Midwife  Physiotherapist  Counsellor  Phlebotomist  Podiatrist  Other therapist  Practice Manager  Reception  Administrator  Medical Secretary  Dispenser  Other Staff

### 30. Can you give us an estimate of the proportion of your practice population that are:

New migrants (<5 years in the UK)

Asylum seekers/refugees

Other migrants (please specify)

### 31. What database system does your practice use?

EMIS

SystemOne (TPP)

Microtest

Vision (INPS)

Not known

Other, please specify

### 32. Does your practice routinely record the following on practice systems?

Patient ethnicity Yes  No  NK

Patient country of birth Yes  No  NK

Hepatitis diagnosis Yes  No  NK

Hepatitis prescription Yes  No  NK

### 33. What do you think are the top 3 countries of birth of migrants registered with your practice?

1.

2.

3.



**34. What do you think are the main reasons for migration for new migrants in your practice area?**

|                                               | Main reason              | Common reason            | Not a common reason      | NK                       |
|-----------------------------------------------|--------------------------|--------------------------|--------------------------|--------------------------|
| Economic (e.g. work)                          | <input type="checkbox"/> | <input type="checkbox"/> | <input type="checkbox"/> | <input type="checkbox"/> |
| Asylum (i.e. fleeing conflict or persecution) | <input type="checkbox"/> | <input type="checkbox"/> | <input type="checkbox"/> | <input type="checkbox"/> |
| Study                                         | <input type="checkbox"/> | <input type="checkbox"/> | <input type="checkbox"/> | <input type="checkbox"/> |
| Accompanying/joining family                   | <input type="checkbox"/> | <input type="checkbox"/> | <input type="checkbox"/> | <input type="checkbox"/> |
| Other                                         | <input type="checkbox"/> | <input type="checkbox"/> | <input type="checkbox"/> | <input type="checkbox"/> |

**35. These questions are about interpreter and outreach facilities offered by your practice.**

Do you offer interpreter facilities? Yes  No  NK

Do you offer any outreach services? Yes  No  NK

Do you offer any outreach services specifically for migrants/vulnerable migrants? Yes  No  NK

**36. How could health and social care services be improved to meet the needs of recent migrants to your area?**

**37. Please name any refugee or migrant support or advocacy groups/organisations in your area that you would recommend to a migrant patient.**

**Survey completed**

**Thank you for taking the survey!**
