# Supplementary material for: What do primary care staff know and do about blood borne virus testing and care for migrant patients? A national survey
Source: Springer Nature journal article supplement (doi:10.1186/s12889-020-10068-x), 2021-02-11
Supplement: MOESM2 [file 18856194]

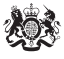

# GP knowledge, attitudes, policy and practice regarding blood borne viruses (BBV) among migrants, including refugees and asylum seekers

Public Health England (PHE) is carrying out a survey of GPs' knowledge, attitudes, policy and practice on BBV testing and care among migrants including refugees and asylum seekers. This is part of a larger programme of work to identify good practice and gaps in BBV service provision for these populations.

**We would be grateful if you would complete this short survey.**

**Email address:** .....

## Please tell us who you are

GP Partner  Salaried GP  Locum GP  Practice Nurse  Practice Manager

Other, please specify: .....

## Where is your practice based?

East of England  London  Midlands  North East  North West  South East  South West

## 1 To the best of your knowledge, as of August 2017 which of the following services are free to all irrespective of migration status in England?

- |                                                                                                                            |                              |                             |                                    |
|----------------------------------------------------------------------------------------------------------------------------|------------------------------|-----------------------------|------------------------------------|
| GP and nurse consultations in primary care .....                                                                           | Yes <input type="checkbox"/> | No <input type="checkbox"/> | Not known <input type="checkbox"/> |
| Emergency departments and walk in centres .....                                                                            | Yes <input type="checkbox"/> | No <input type="checkbox"/> | Not known <input type="checkbox"/> |
| Communicable disease services .....                                                                                        | Yes <input type="checkbox"/> | No <input type="checkbox"/> | Not known <input type="checkbox"/> |
| Sexually transmitted disease services .....                                                                                | Yes <input type="checkbox"/> | No <input type="checkbox"/> | Not known <input type="checkbox"/> |
| Family Planning Services .....                                                                                             | Yes <input type="checkbox"/> | No <input type="checkbox"/> | Not known <input type="checkbox"/> |
| Operations or outpatient services in secondary care .....                                                                  | Yes <input type="checkbox"/> | No <input type="checkbox"/> | Not known <input type="checkbox"/> |
| Hepatitis B and C testing, diagnosis and management .....                                                                  | Yes <input type="checkbox"/> | No <input type="checkbox"/> | Not known <input type="checkbox"/> |
| Treatment of physical or mental conditions caused by torture, female genital mutilation, domestic or sexual violence ..... | Yes <input type="checkbox"/> | No <input type="checkbox"/> | Not known <input type="checkbox"/> |

## 2 PHE publishes a Migrant Health Guide online (GOV.UK.); Have you heard it?

Yes  No

## 3 Do you see migrant patients in your practice?

Frequently  Sometimes  Rarely

**4 Which of the following issues would you consider when speaking to new migrant patients?**

|                                         | All new migrants         | Asylum seekers/<br>refugees only | Never consider this      | Situation specific       |
|-----------------------------------------|--------------------------|----------------------------------|--------------------------|--------------------------|
| Vaccination history .....               | <input type="checkbox"/> | <input type="checkbox"/>         | <input type="checkbox"/> | <input type="checkbox"/> |
| Sexual health advice and screening .... | <input type="checkbox"/> | <input type="checkbox"/>         | <input type="checkbox"/> | <input type="checkbox"/> |
| Family planning .....                   | <input type="checkbox"/> | <input type="checkbox"/>         | <input type="checkbox"/> | <input type="checkbox"/> |
| TB screening .....                      | <input type="checkbox"/> | <input type="checkbox"/>         | <input type="checkbox"/> | <input type="checkbox"/> |
| HIV risk assessment .....               | <input type="checkbox"/> | <input type="checkbox"/>         | <input type="checkbox"/> | <input type="checkbox"/> |
| Hepatitis B (HBV) risk assessment ..... | <input type="checkbox"/> | <input type="checkbox"/>         | <input type="checkbox"/> | <input type="checkbox"/> |
| Hepatitis C (HCV) risk assessment ..... | <input type="checkbox"/> | <input type="checkbox"/>         | <input type="checkbox"/> | <input type="checkbox"/> |

**5 What is the current policy for BBV testing in the practice you predominantly work in:**

**New Migrants?**

|                                                                     | HIV                      | HBV                      | HCV                      |
|---------------------------------------------------------------------|--------------------------|--------------------------|--------------------------|
| Offered universally/'opt out' basis .....                           | <input type="checkbox"/> | <input type="checkbox"/> | <input type="checkbox"/> |
| Offered on ad hoc basis, depending on individual risk factors ..... | <input type="checkbox"/> | <input type="checkbox"/> | <input type="checkbox"/> |
| None of the above .....                                             | <input type="checkbox"/> | <input type="checkbox"/> | <input type="checkbox"/> |
| Don't know .....                                                    | <input type="checkbox"/> | <input type="checkbox"/> | <input type="checkbox"/> |

**EXISTING patients from high prevalence countries?**

|                                                                     | HIV                      | HBV                      | HCV                      |
|---------------------------------------------------------------------|--------------------------|--------------------------|--------------------------|
| Offered universally / 'opt out' basis .....                         | <input type="checkbox"/> | <input type="checkbox"/> | <input type="checkbox"/> |
| Offered on ad hoc basis, depending on individual risk factors ..... | <input type="checkbox"/> | <input type="checkbox"/> | <input type="checkbox"/> |
| None of the above .....                                             | <input type="checkbox"/> | <input type="checkbox"/> | <input type="checkbox"/> |
| Don't know .....                                                    | <input type="checkbox"/> | <input type="checkbox"/> | <input type="checkbox"/> |

**6 Which of the following would be an incentive or motivation to test for BBVs in migrants?**

|                                     |                              |                             |                                    |
|-------------------------------------|------------------------------|-----------------------------|------------------------------------|
| Performance payment structure ..... | Yes <input type="checkbox"/> | No <input type="checkbox"/> | Not known <input type="checkbox"/> |
| Local targets .....                 | Yes <input type="checkbox"/> | No <input type="checkbox"/> | Not known <input type="checkbox"/> |
| National goals .....                | Yes <input type="checkbox"/> | No <input type="checkbox"/> | Not known <input type="checkbox"/> |
| CCG recommendations .....           | Yes <input type="checkbox"/> | No <input type="checkbox"/> | Not known <input type="checkbox"/> |
| PHE recommendation .....            | Yes <input type="checkbox"/> | No <input type="checkbox"/> | Not known <input type="checkbox"/> |
| NICE guidance .....                 | Yes <input type="checkbox"/> | No <input type="checkbox"/> | Not known <input type="checkbox"/> |
| NHSE recommendations .....          | Yes <input type="checkbox"/> | No <input type="checkbox"/> | Not known <input type="checkbox"/> |
| CMO letter .....                    | Yes <input type="checkbox"/> | No <input type="checkbox"/> | Not known <input type="checkbox"/> |
| None of the above .....             | Yes <input type="checkbox"/> | No <input type="checkbox"/> | Not known <input type="checkbox"/> |

**Would you be happy for us to email a longer survey regarding BBVs among migrants?**

Yes  No

**Thank you for taking the survey!**
