# Supplementary material for: What do primary care staff know and do about blood borne virus testing and care for migrant patients? A national survey
Source: Springer Nature journal article supplement (doi:10.1186/s12889-020-10068-x), 2021-02-11
Supplement: MOESM4 [file 18856194]

## Example responses for barriers questions, by theme and part of care pathway

| Theme                           | Health care                                                                                                               | BBV testing                                                                                                                                   | Secondary care                                                                                                                                                                                         |
|---------------------------------|---------------------------------------------------------------------------------------------------------------------------|-----------------------------------------------------------------------------------------------------------------------------------------------|--------------------------------------------------------------------------------------------------------------------------------------------------------------------------------------------------------|
| Language / culture              | "language"<br>"language barrier"                                                                                          | "language"<br>"difficulties with language/interpretation taking too long"                                                                     | "language barriers"<br>"language"<br>"costs of interpretation services"                                                                                                                                |
| Patient information / knowledge | "knowledge of what services available and how to access"<br>"uncertainty about eligibility"<br>"not knowing their rights" | "knowing what services available within GP practice"<br>"understanding about BBVs"<br>"awareness of treatment options"                        | "unfamiliarity with NHS system"<br>"lack of understanding about purpose of referral"<br>"understanding about service provision"                                                                        |
| Staff information / knowledge   | "uncertainty about entitlements"<br>"ignorance lack of training"                                                          | "realising not already tested"<br>"clinicians don't think to suggest BBV testing"<br>"HCP lack of knowledge"                                  | "poor training and commitment of healthcare staff"<br>"lack of knowledge"<br>"ignorance of some secondary care staff to both their infectivity/perceived risk to staff and their access to healthcare" |
| Psychological                   | "fear"<br>"fear of deportation"<br>"fear of authority"                                                                    | "fear of positive result"<br>"confidentiality concerns and fear of positive result and stigma"                                                | "patients frightened of the outcome"<br>"stigma"<br>"fear"                                                                                                                                             |
| Accommodation                   | "NFA"<br>"no fixed abode"<br>"frequently moved around"                                                                    | "move around a lot"<br>"often transient"<br>"often have no fixed address or means of contact"                                                 | "moving from place to place"<br>"fixed address, move often"                                                                                                                                            |
| Prejudice / discrimination      | "discrimination"<br>"public perceptions"<br>"prejudice, hostile conditions"                                               | "prejudice"                                                                                                                                   | "fear of treatment by hospital staff due to immigration status"<br>"The Daily Mail and its racist propaganda"<br>"perceived hostility issues"                                                          |
| Financial (patient)             | "cost"<br>"fear they will have to pay"<br>"money"                                                                         |                                                                                                                                               | "cost"<br>"no money for transport to appointments"                                                                                                                                                     |
| Resource                        | "lack of capacity in system"<br>"appointment availability"<br>"cuts to services"                                          | "resource implications and increasing demand on GP time and work overload"<br>"lack of time"<br>"time, multiple other issues being prevented" | "resource implications"<br>"lack of interpreters"<br>"time and incentive"                                                                                                                              |
| Geographical                    | "location"<br>"transport"                                                                                                 |                                                                                                                                               | "distance from where they live and costs of transport"<br>"travel to hospital in city"                                                                                                                 |
| Service / organisational issues | "systems/bureaucracy"<br>"services not tailored for their needs"<br>"lack of specialist free services"                    | "lack of new patient assessments within our practice"<br>"no policy in place"<br>"poor IT system support"                                     | "clinic arrangements/timetables"<br>"time delay between referral and appointment"<br>"lack of organised clinic. No structured approach"                                                                |
